# Supplementary material
Source: PubMed Central journal article supplement (PMC3478318)
Supplement: cc-11-3679-s01.pdf [file cc-11-3679-s01.pdf]

## **Supplemental Material to:**

**Shuo Qie, Dongming Liang, Chengqian Yin, Weiting Gu,  
Meng Meng, Chenguang Wang and Nianli Sang**

**Glutamine depletion and glucose depletion  
trigger growth inhibition via distinctive  
gene expression reprogramming**

**2012; 11(19)**

**<http://dx.doi.org/10.4161/cc.21944>**

**<http://www.landesbioscience.com/journals/cc/article/21944>**

**A.****Control**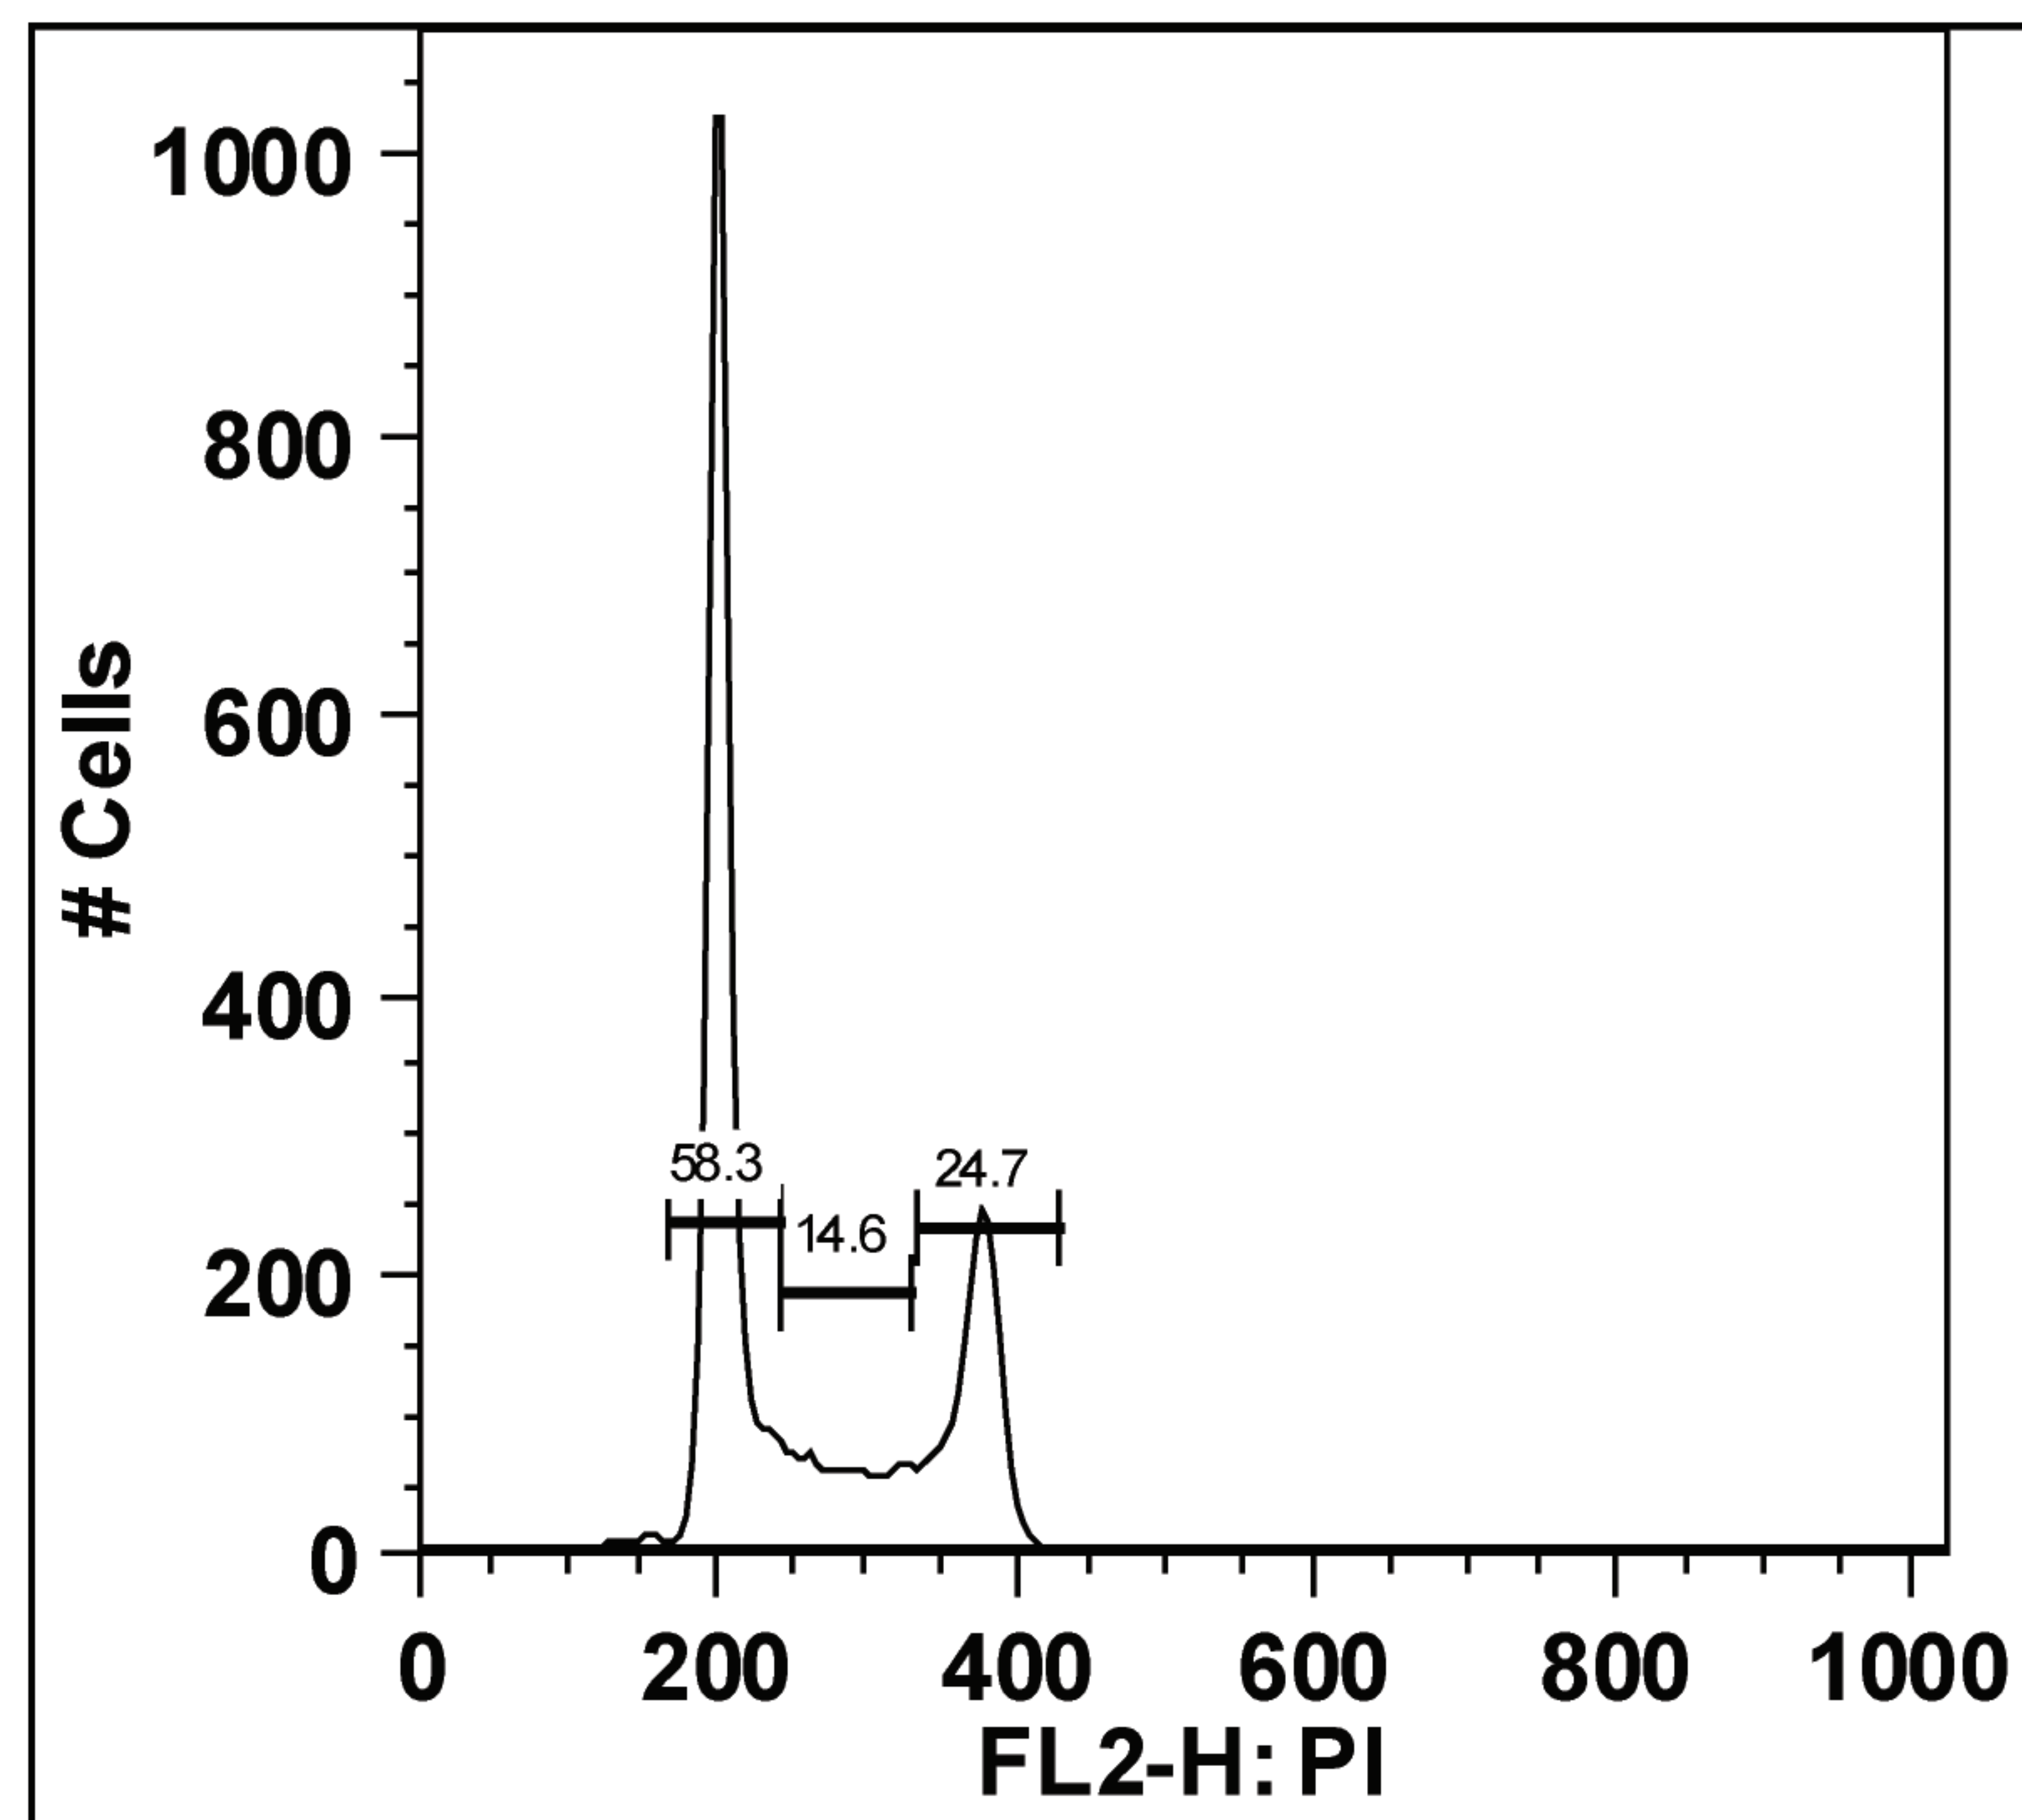**Gln-**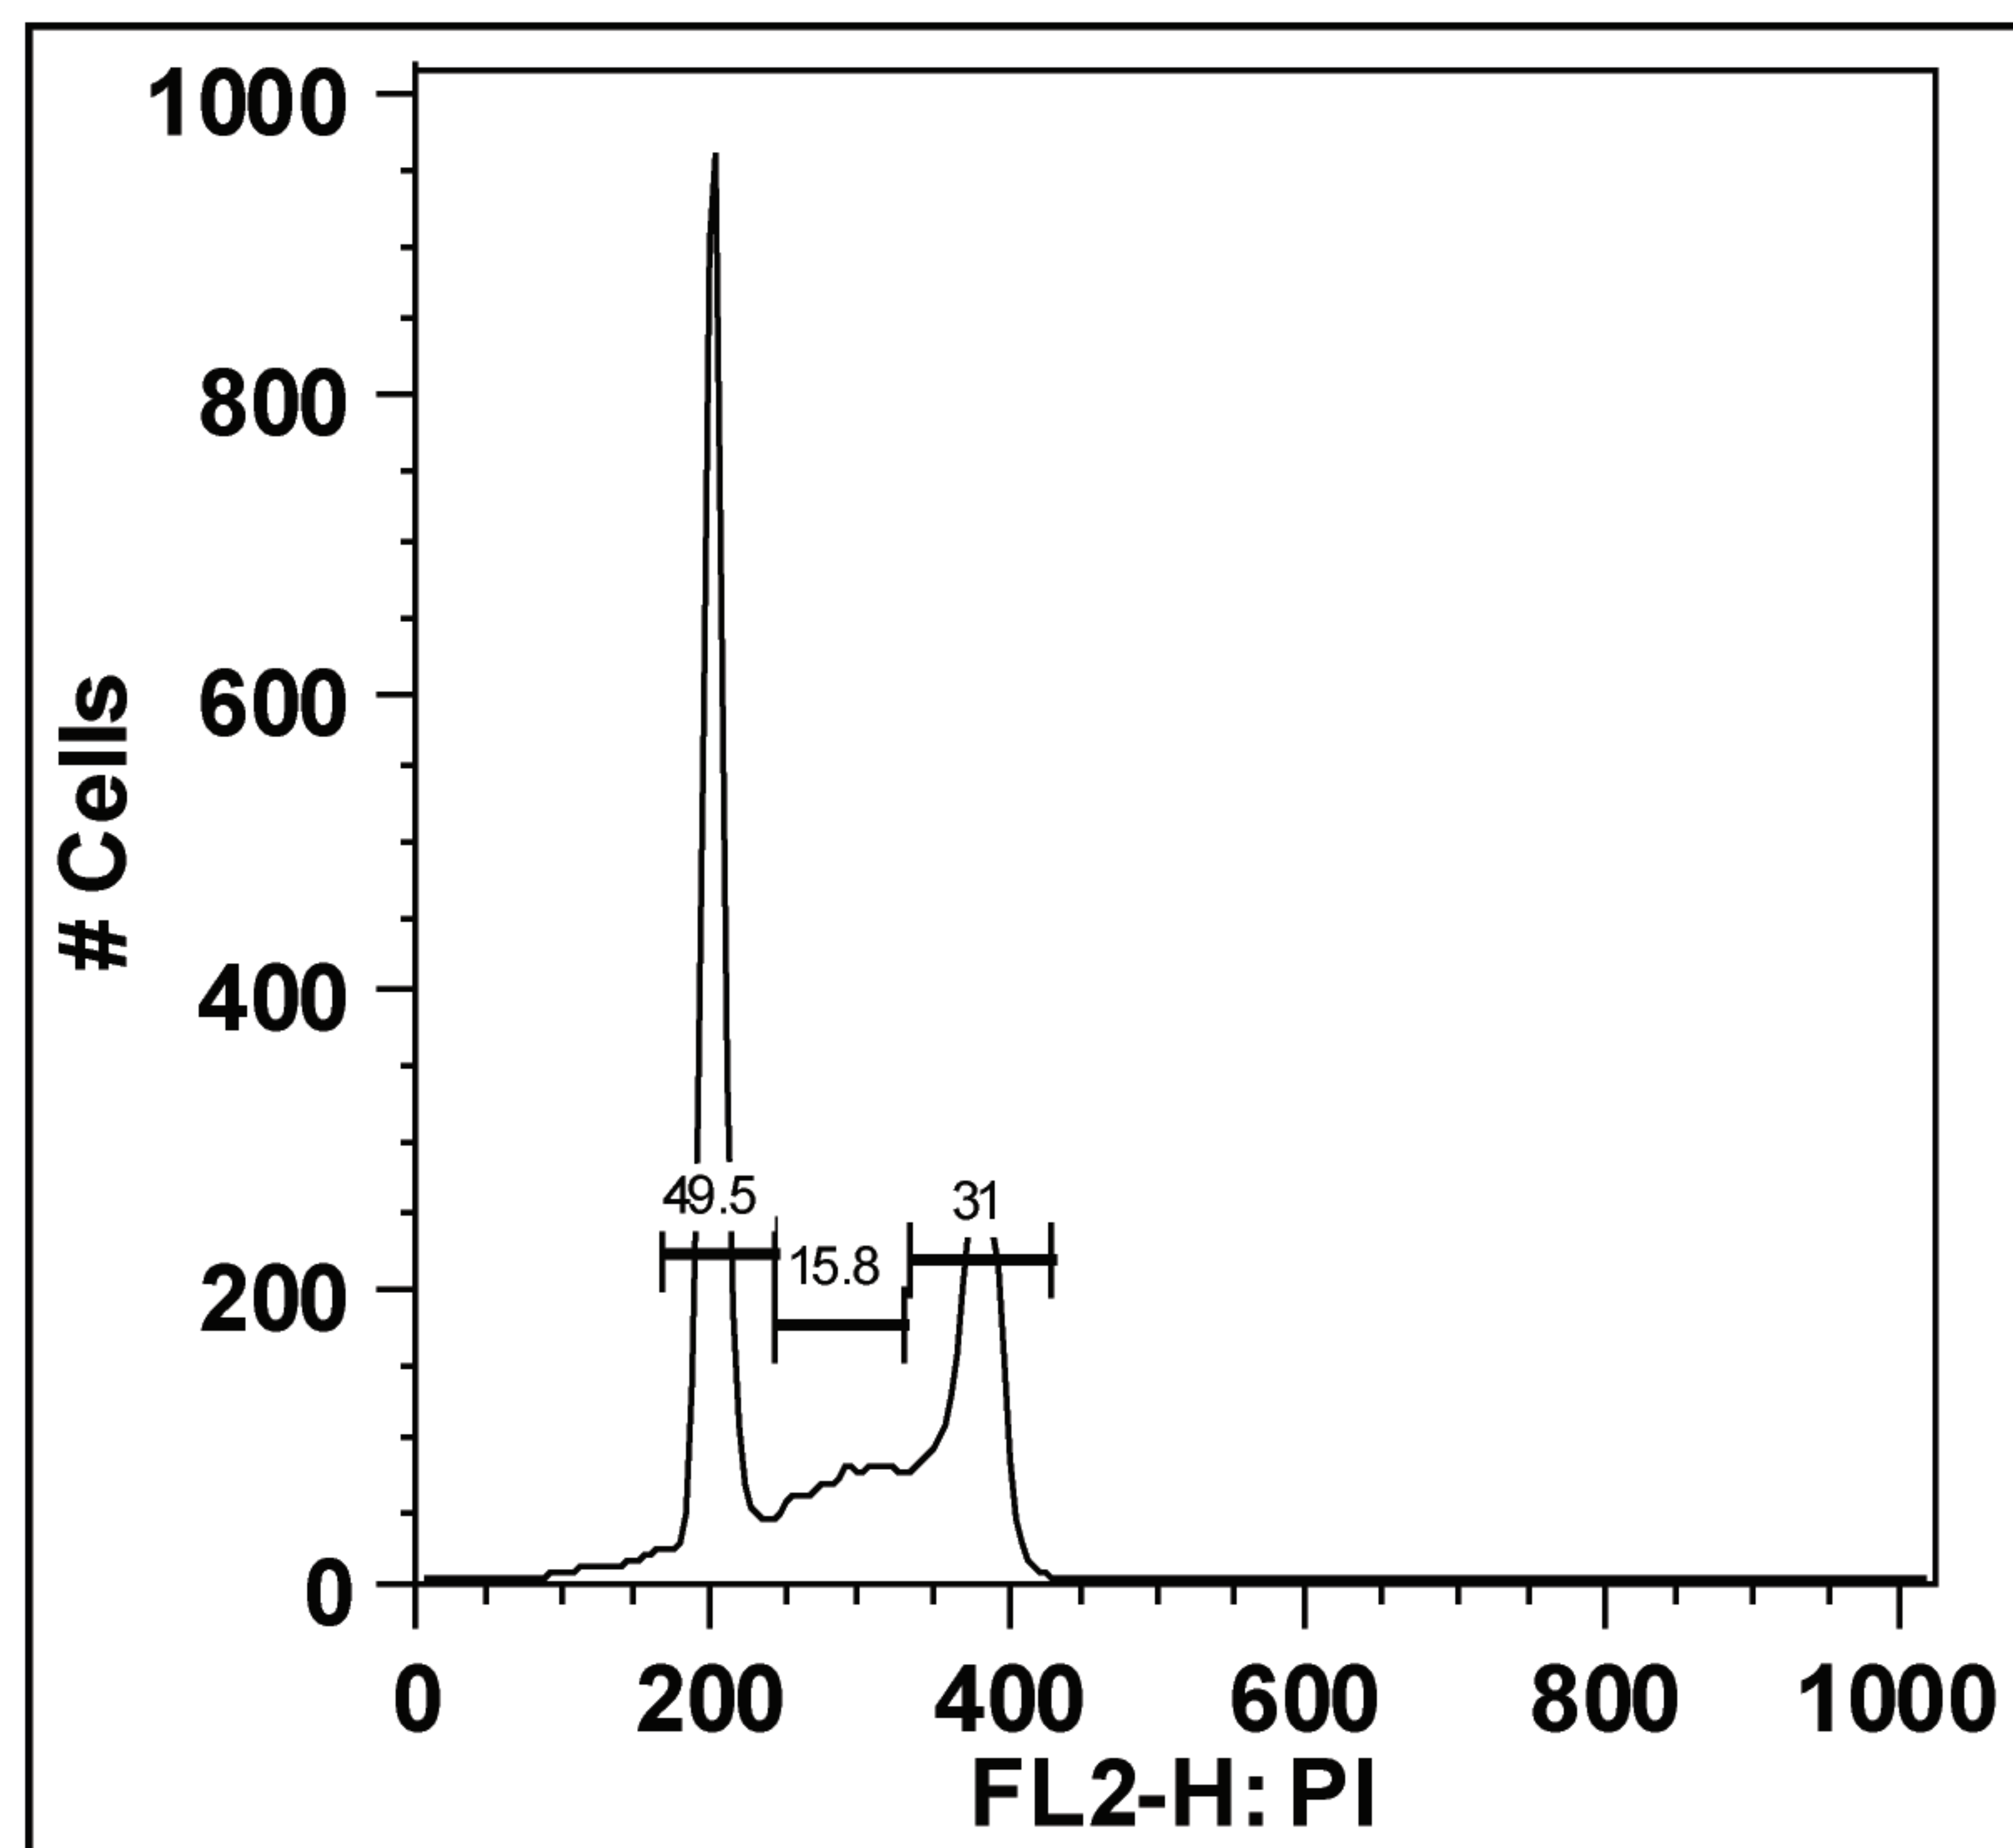**Glc-**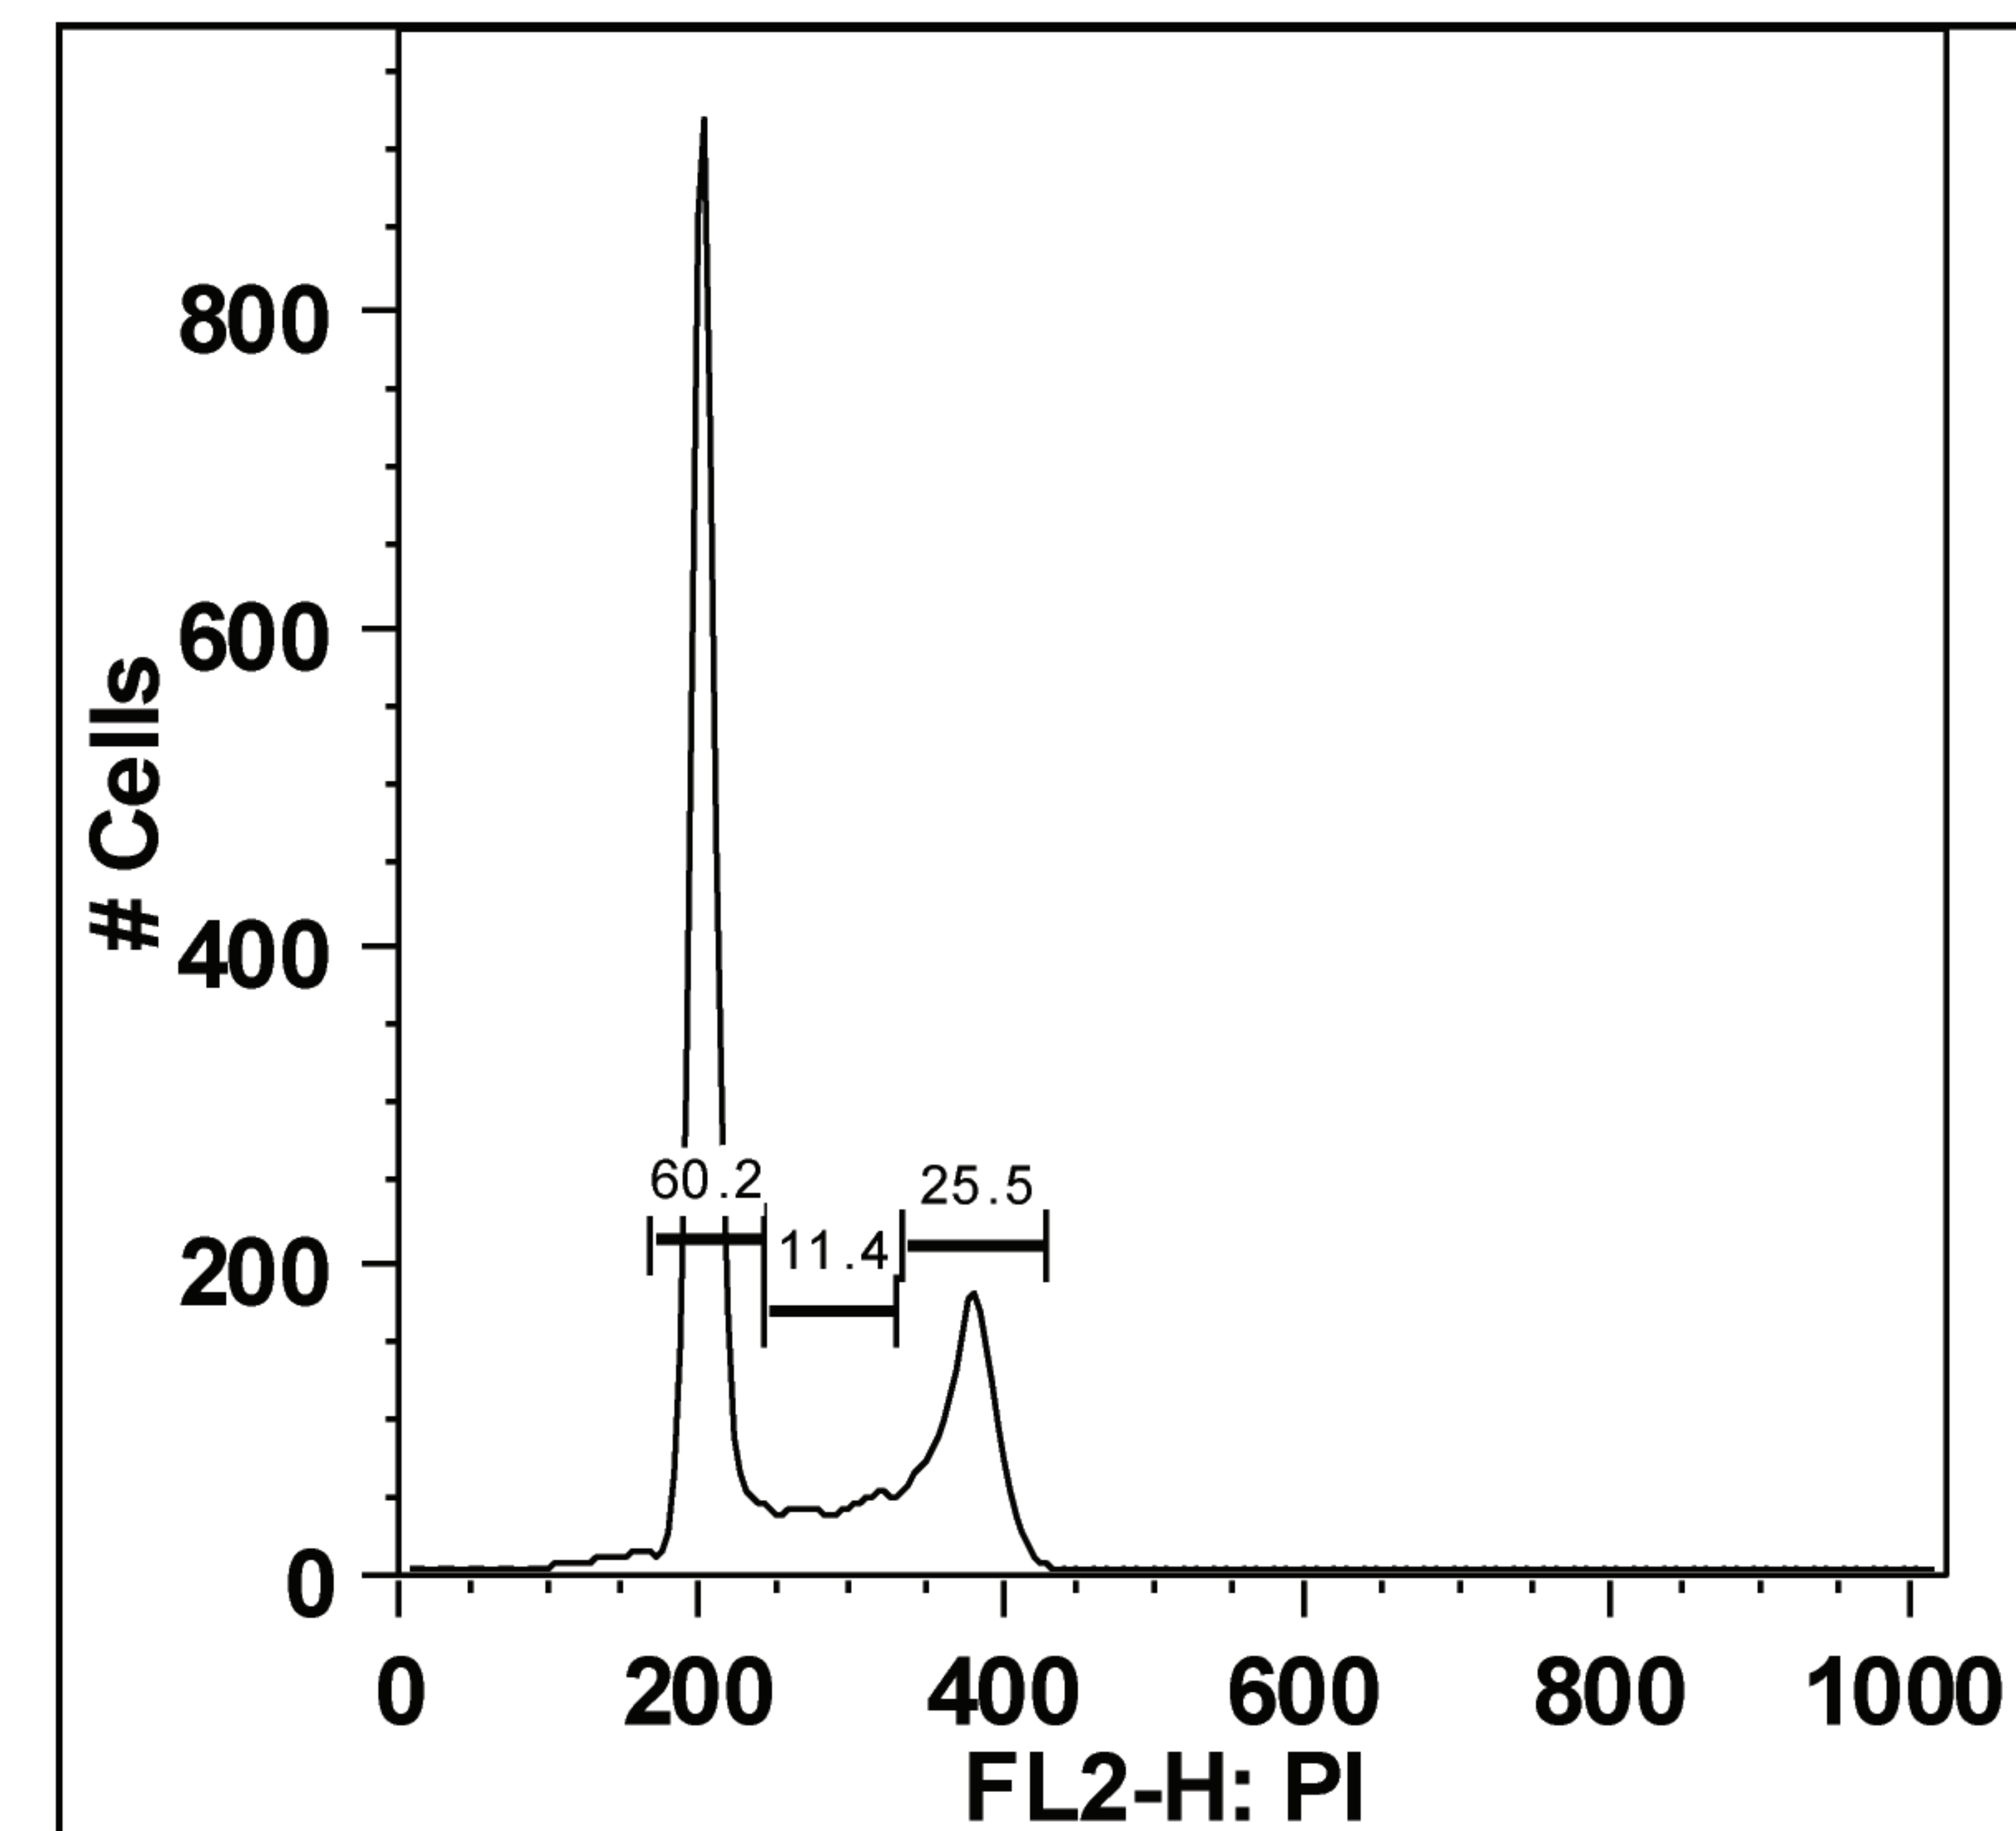**B.**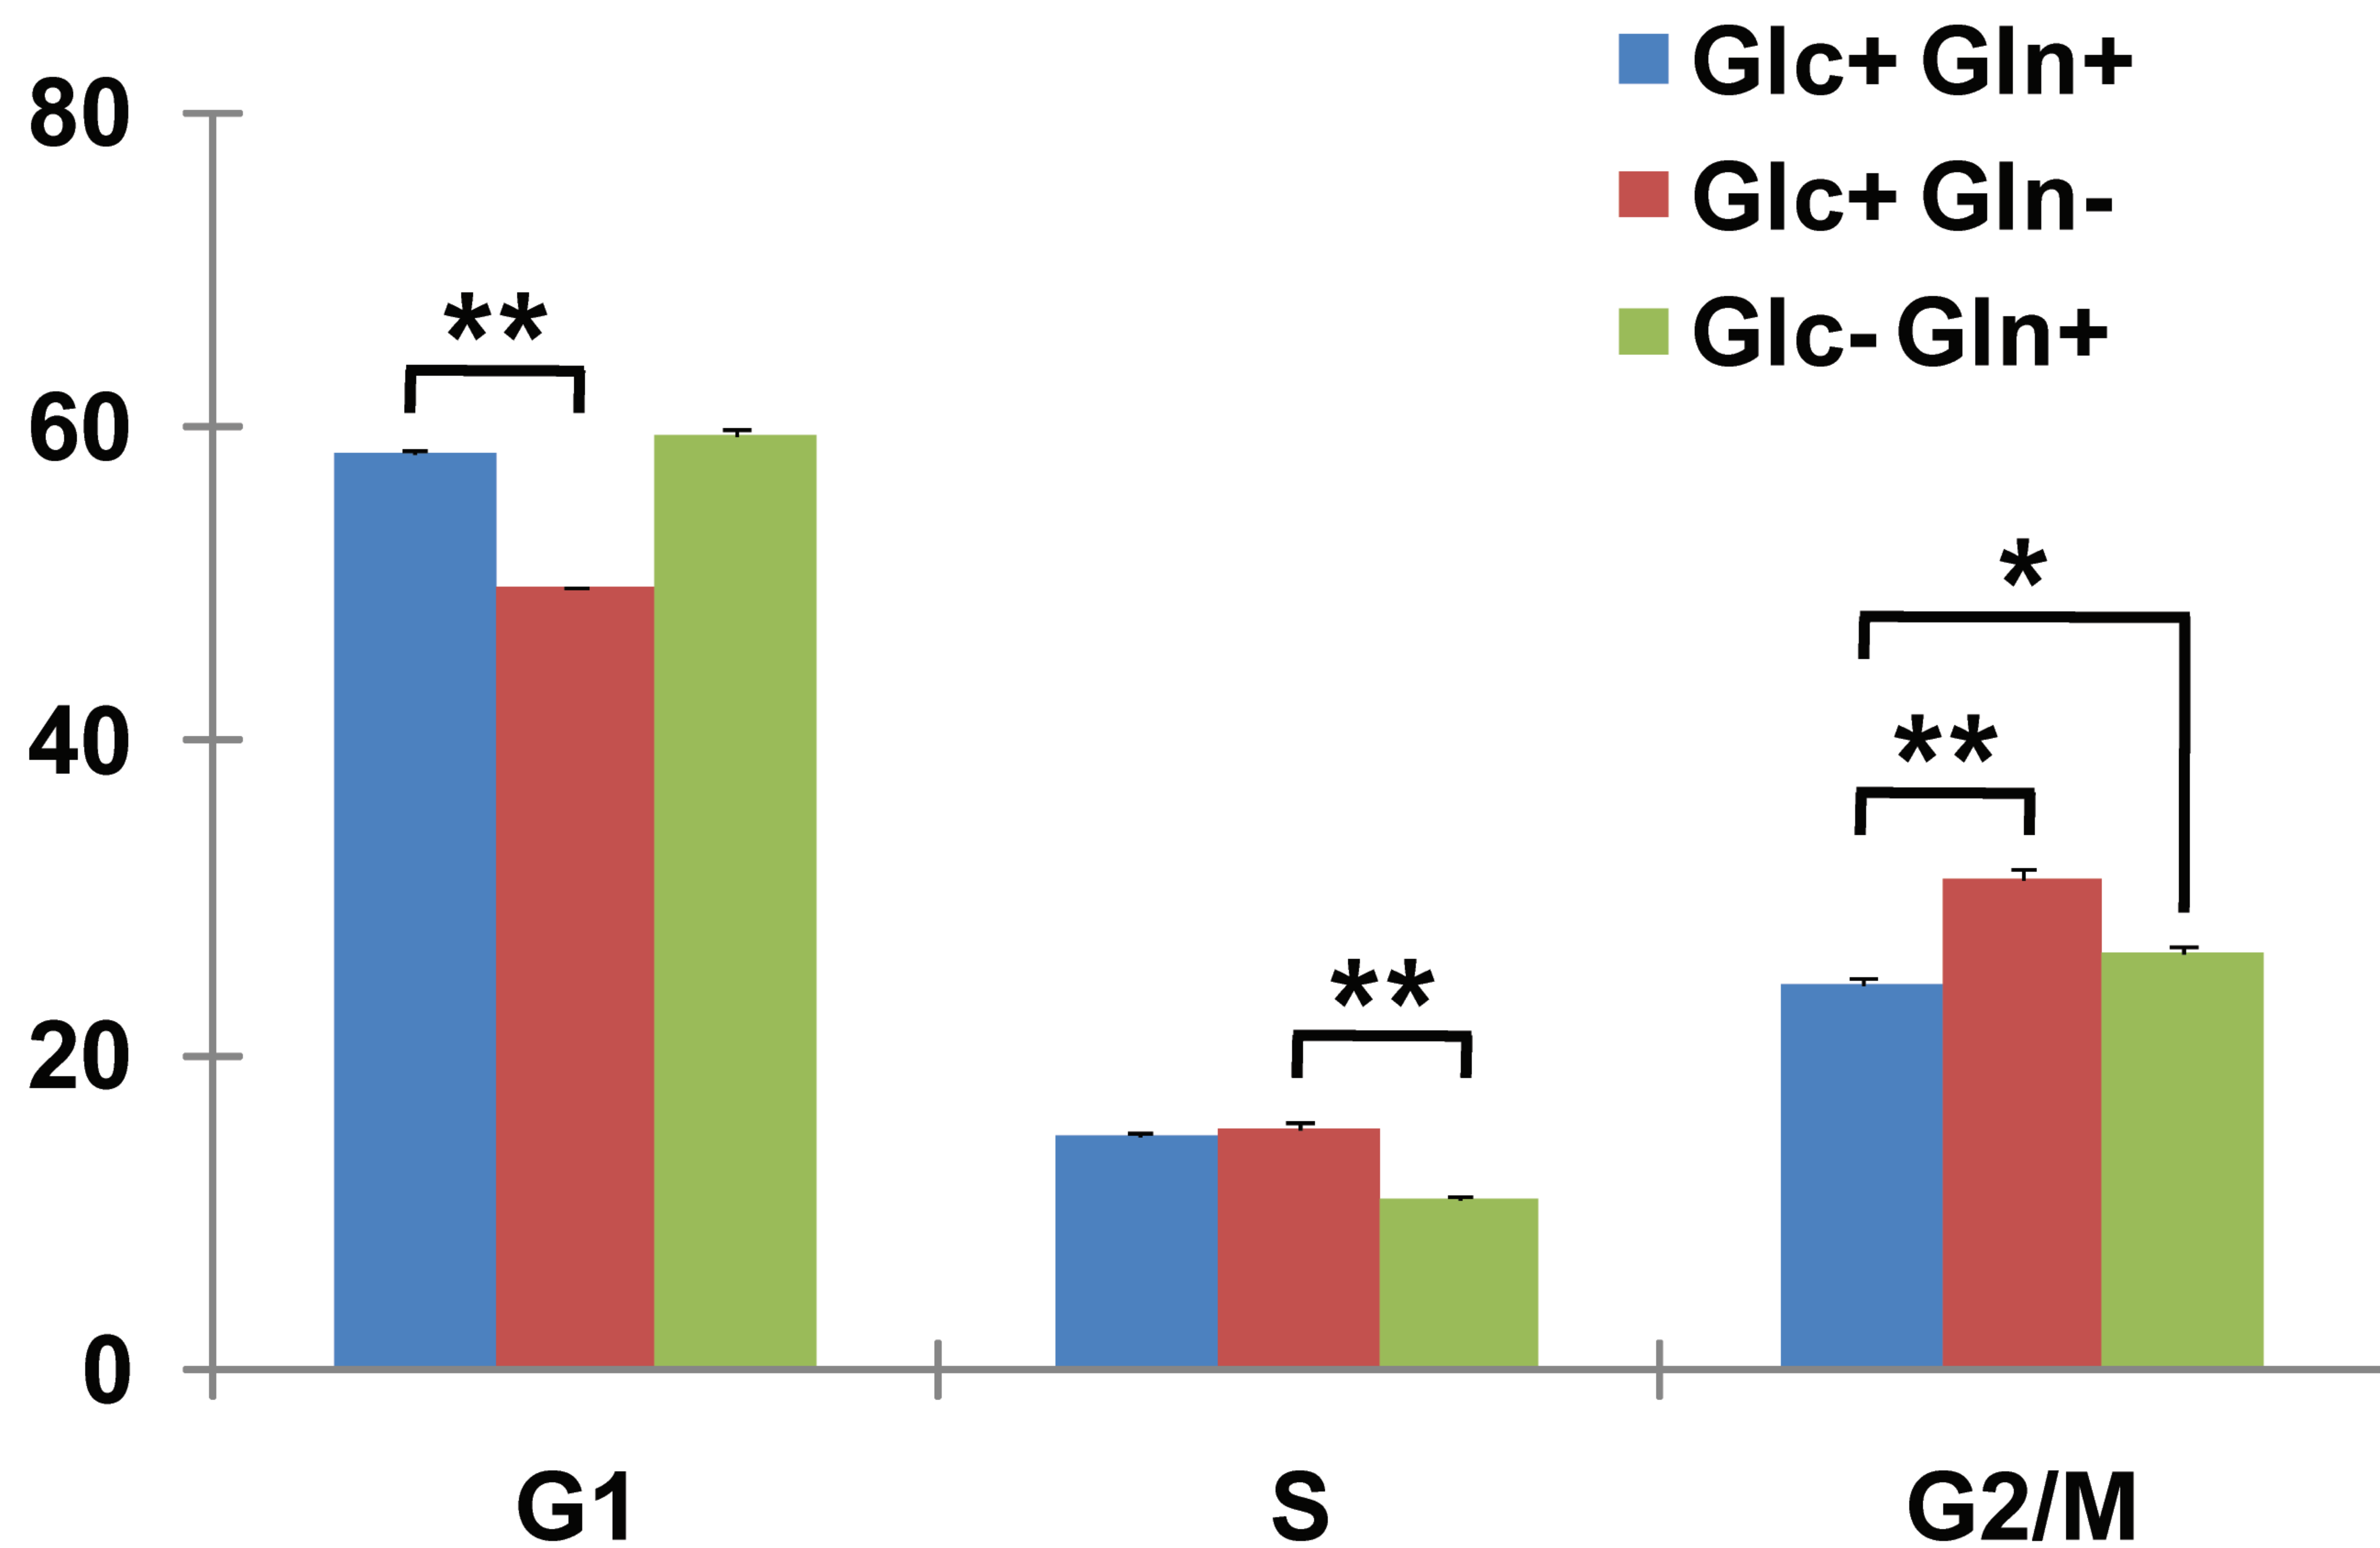

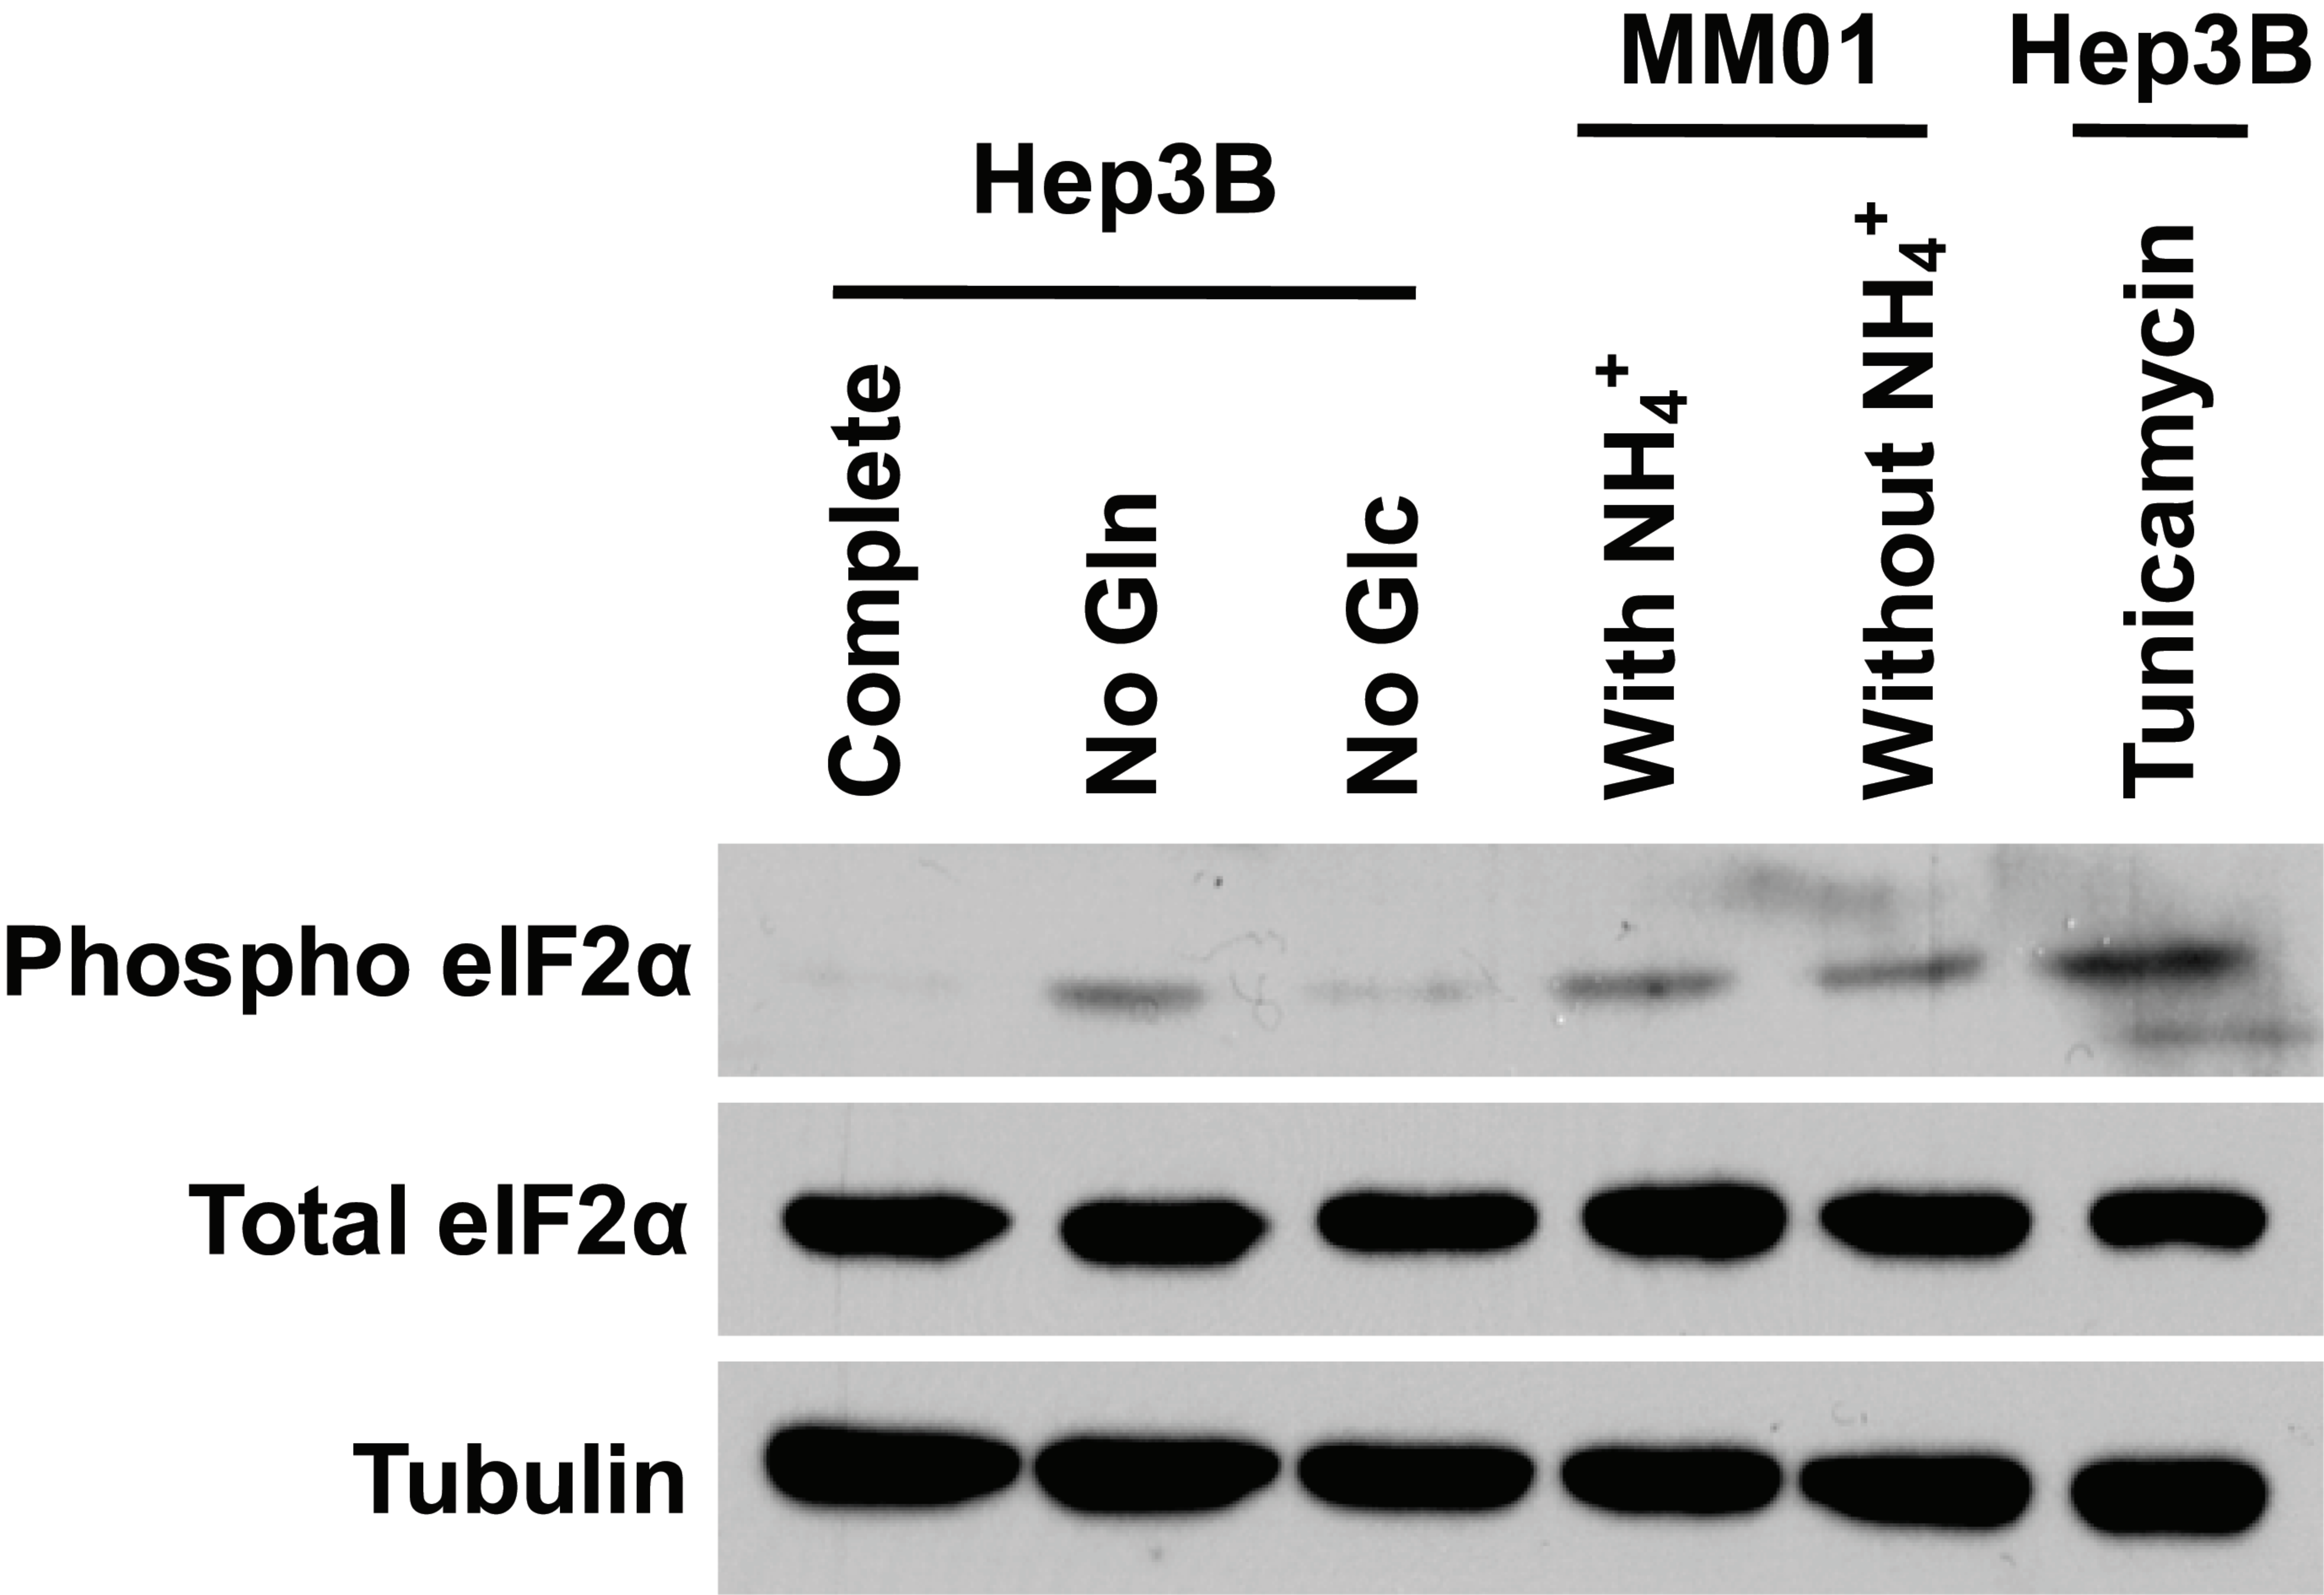

**Supplemental Table 1 (In a separated Excel file.)**

The list of detected genes in Hep3B cells treated with either Gln- or Glc-depletion or MM01 cells compared to Hep3B cells in complete medium. (List based on Gln-depleted/Control with Log<sub>2</sub> Ratio >3 & <-3).

**Supplemental Table 2 (In a separated Excel file.)**

The lists of genes for Figure 2E as following:

|                                | Sheet No. | Group                                             |
|--------------------------------|-----------|---------------------------------------------------|
| Gln-depletion vs Control cells | Sheet 1   | Cell Cycle Control of Chromosomal Replication     |
|                                | Sheet 2   | Cell Cycle Regulation by BTG Family Proteins      |
|                                | Sheet 3   | Cell Cycle: G1/S Checkpoint Regulation            |
|                                | Sheet 4   | Cyclins and Cell Cycle Regulation                 |
|                                | Sheet5    | Mitotic Roles of Polo-Like Kinase                 |
|                                | Sheet 6   | Cell Cycle: G2/M DNA Damage Checkpoint Regulation |
| Glc-depletion vs Control cells | Sheet 7   | Cell Cycle Control of Chromosomal Replication     |
|                                | Sheet 8   | Cell Cycle Regulation by BTG Family Proteins      |
|                                | Sheet 9   | Cell Cycle: G1/S Checkpoint Regulation            |
|                                | Sheet 10  | Cyclins and Cell Cycle Regulation                 |
|                                | Sheet 11  | Mitotic Roles of Polo-Like Kinase                 |
|                                | Sheet 12  | Cell Cycle: G2/M DNA Damage Checkpoint Regulation |

**Supplemental Table 3 Regulation Directions of TCF3 Target Genes Upon Gln-Depletion**

| <b>Target Genes</b> | <b>Log<sub>2</sub>Ratio</b> | <b>Published Findings</b> | <b>Prediction</b> |
|---------------------|-----------------------------|---------------------------|-------------------|
| <i>WBP5</i>         | -3.343                      | Downregulates (1)         | Activated         |
| <i>TYMS</i>         | -2.308                      | Downregulates (1)         | Activated         |
| <i>TOP2A</i>        | -2.881                      | Downregulates (1)         | Activated         |
| <i>TCF3</i>         | 1.616                       | Upregulates (11)          | Activated         |
| <i>SLC12A2</i>      | -1.115                      | Downregulates (1)         | Activated         |
| <i>PGK1</i>         | -2.324                      | Downregulates (1)         | Activated         |
| <i>NKX2-5</i>       | 1.114                       | Upregulates (1)           | Activated         |
| <i>MKI67</i>        | -1.600                      | Downregulates (1)         | Activated         |
| <i>MAD2L1</i>       | -3.492                      | Downregulates (1)         | Activated         |
| <i>KLHDC2</i>       | -2.862                      | Downregulates (1)         | Activated         |
| <i>FGFR2</i>        | -2.384                      | Downregulates (3)         | Activated         |
| <i>EPRS</i>         | -5.584                      | Downregulates (1)         | Activated         |
| <i>DAB2IP</i>       | 2.447                       | Upregulates (2)           | Activated         |
| <i>CDH1</i>         | -3.429                      | Downregulates (4)         | Activated         |
| <i>CCND3</i>        | 1.020                       | Upregulates (1)           | Activated         |
| <i>CCNA2</i>        | -2.753                      | Downregulates (1)         | Activated         |
| <i>CA2</i>          | -1.991                      | Downregulates (1)         | Activated         |
| <i>BCL2L11</i>      | 1.057                       | Upregulates (3)           | Activated         |
| <i>ATF3</i>         | -1.833                      | Downregulates (1)         | Activated         |
| <i>ANLN</i>         | -2.477                      | Downregulates (1)         | Activated         |
| <i>AATF</i>         | -4.070                      | Regulates (1)             |                   |
| <i>ACACB</i>        | 1.779                       | Regulates (8)             |                   |
| <i>AP3D1</i>        | -2.799                      | Regulates (1)             |                   |
| <i>ARSA</i>         | 1.258                       | Regulates (1)             |                   |
| <i>BID</i>          | -1.330                      | Regulates (1)             |                   |
| <i>CASP3</i>        | -3.254                      | Regulates (1)             |                   |
| <i>CASP6</i>        | -5.129                      | Regulates (1)             |                   |
| <i>CCNE1</i>        | -6.109                      | Regulates (1)             |                   |
| <i>CHRNA5</i>       | -1.648                      | Regulates (1)             |                   |
| <i>CPT1B</i>        | 1.717                       | Regulates (1)             |                   |
| <i>CYP11A1</i>      | 2.416                       | Regulates (1)             |                   |
| <i>DOCK1</i>        | -2.450                      | Regulates (1)             |                   |
| <i>E2F4</i>         | -4.240                      | Regulates (1)             |                   |
| <i>ETS2</i>         | 1.267                       | Regulates (1)             |                   |
| <i>GADD45A</i>      | -3.341                      | Regulates (1)             |                   |
| <i>GATA2</i>        | -1.815                      | Regulates (1)             |                   |
| <i>GATA3</i>        | 1.218                       | Regulates (2)             |                   |
| <i>GPAM</i>         | 1.204                       | Regulates (1)             |                   |
| <i>ID2</i>          | -3.763                      | Regulates (1)             |                   |

|                 |        |               |
|-----------------|--------|---------------|
| <i>IFNAR1</i>   | 1.050  | Regulates (1) |
| <i>JUND</i>     | 1.293  | Regulates (1) |
| <i>LRBA</i>     | -3.714 | Regulates (1) |
| <i>MLLT4</i>    | 1.394  | Regulates (1) |
| <i>MSMO1</i>    | -1.107 | Regulates (1) |
| <i>MYC</i>      | 1.471  | Regulates (1) |
| <i>NFIL3</i>    | 1.909  | Regulates (2) |
| <i>PAFAH1B3</i> | -2.704 | Regulates (1) |
| <i>PLCG2</i>    | 2.595  | Regulates (1) |
| <i>PTPRU</i>    | 2.551  | Regulates (1) |
| <i>RORA</i>     | 1.148  | Regulates (1) |
| <i>TF</i>       | -5.361 | Regulates (1) |
| <i>TMEM180</i>  | 2.032  | Regulates (1) |
| <i>XBP1</i>     | -6.097 | Regulates (1) |

---

\* TCF3 function predicted based on directions of target gene expression.



**Supplemental Table 4 Regulation Directions of XBP1 Target Genes Upon Glc-Depletion**

| Genes in dataset | Log <sub>2</sub> Ratio | Findings         | Prediction*      |
|------------------|------------------------|------------------|------------------|
| <i>SRP68</i>     | 1.159                  | Upregulates (1)  | <b>Activated</b> |
| <i>SERP1</i>     | 1.667                  | Upregulates (2)  | <b>Activated</b> |
| <i>SEC24D</i>    | 1.230                  | Upregulates (1)  | <b>Activated</b> |
| <i>SEC22B</i>    | 1.050                  | Upregulates (1)  | <b>Activated</b> |
| <i>PIGA</i>      | 1.179                  | Upregulates (1)  | <b>Activated</b> |
| <i>PDIA6</i>     | 1.317                  | Upregulates (2)  | <b>Activated</b> |
| <i>MCFD2</i>     | 1.227                  | Upregulates (1)  | <b>Activated</b> |
| <i>HYOU1</i>     | 1.543                  | Upregulates (1)  | <b>Activated</b> |
| <i>HSPA13</i>    | 2.207                  | Upregulates (1)  | <b>Activated</b> |
| <i>HMOX1</i>     | 2.244                  | Upregulates (1)  | <b>Activated</b> |
| <i>HM13</i>      | 1.191                  | Upregulates (1)  | <b>Activated</b> |
| <i>HERPUD1</i>   | 2.349                  | Upregulates (1)  | <b>Activated</b> |
| <i>GOLPH3L</i>   | 1.055                  | Upregulates (1)  | <b>Activated</b> |
| <i>GOLGA4</i>    | 1.064                  | Upregulates (1)  | <b>Activated</b> |
| <i>EDEM1</i>     | 1.292                  | Upregulates (7)  | <b>Activated</b> |
| <i>DNAJC1</i>    | 1.357                  | Upregulates (1)  | <b>Activated</b> |
| <i>DNAJB9</i>    | 3.093                  | Upregulates (6)  | <b>Activated</b> |
| <i>DERL1</i>     | 1.290                  | Upregulates (1)  | <b>Activated</b> |
| <i>DDIT3</i>     | 2.642                  | Upregulates (1)  | <b>Activated</b> |
| <i>COG6</i>      | 1.033                  | Upregulates (1)  | <b>Activated</b> |
| <i>BFAR</i>      | 1.241                  | Upregulates (1)  | <b>Activated</b> |
| <i>BET1</i>      | 1.171                  | Upregulates (1)  | <b>Activated</b> |
| <i>ATF6</i>      | 1.423                  | Upregulates (1)  | <b>Activated</b> |
| <i>ARFGAP3</i>   | 1.811                  | Upregulates (1)  | <b>Activated</b> |
| <i>ALG2</i>      | 1.010                  | Upregulates (1)  | <b>Activated</b> |
| <i>TTR</i>       | -1.702                 | Upregulates (1)  | Inhibited        |
| <i>SERPINA1</i>  | -2.051                 | Upregulates (1)  | Inhibited        |
| <i>RCN3</i>      | -1.208                 | Upregulates (1)  | Inhibited        |
| <i>FKBP1B</i>    | -1.063                 | Upregulates (1)  | Inhibited        |
| <i>FKBP11</i>    | -1.271                 | Upregulates (1)  | Inhibited        |
| <i>CAT</i>       | -1.089                 | Upregulates (16) | Inhibited        |
| <i>APOA1</i>     | -1.039                 | Upregulates (1)  | Inhibited        |
| <i>DNAJC3</i>    | 1.068                  | Regulates (6)    |                  |
| <i>MYC</i>       | 1.752                  | Regulates (2)    |                  |
| <i>TOP1</i>      | 1.580                  | Regulates (1)    |                  |

\* XBP1 function predicted based on directions of target gene expression.

**Supplemental Table 5 Regulation Directions of PPAR $\alpha$  Target Genes in MM01**

| <b>Target Genes</b> | <b>Log(Ratio)</b> | <b>Findings</b>    | <b>Prediction*</b> |
|---------------------|-------------------|--------------------|--------------------|
| <i>SORD</i>         | -1.221            | Downregulates (1)  | Activated          |
| <i>SOCS2</i>        | -1.220            | Downregulates (2)  | Activated          |
| <i>SELENBP1</i>     | -1.424            | Downregulates (1)  | Activated          |
| <i>PAH</i>          | -1.766            | Downregulates (1)  | Activated          |
| <i>NPC1L1</i>       | -1.295            | Downregulates (2)  | Activated          |
| <i>MBL2</i>         | -1.427            | Downregulates (2)  | Activated          |
| <i>KHK</i>          | -1.794            | Downregulates (1)  | Activated          |
| <i>INSIG1</i>       | 1.118             | Upregulates (2)    | Activated          |
| <i>HPD</i>          | -1.749            | Downregulates (1)  | Activated          |
| <i>HNF4A</i>        | -1.284            | Downregulates (2)  | Activated          |
| <i>GOS2</i>         | 1.614             | Upregulates (1)    | Activated          |
| <i>FTCD</i>         | -2.096            | Downregulates (1)  | Activated          |
| <i>FGG</i>          | -1.214            | Downregulates (2)  | Activated          |
| <i>FGB</i>          | -3.597            | Downregulates (6)  | Activated          |
| <i>FGA</i>          | -1.488            | Downregulates (3)  | Activated          |
| <i>EDN1</i>         | -3.070            | Downregulates (2)  | Activated          |
| <i>CEBPD</i>        | -1.241            | Downregulates (1)  | Activated          |
| <i>CDKN2A</i>       | 1.221             | Upregulates (8)    | Activated          |
| <i>C6</i>           | -1.971            | Downregulates (1)  | Activated          |
| <i>C1S</i>          | -2.261            | Downregulates (1)  | Activated          |
| <i>C1R</i>          | -1.641            | Downregulates (1)  | Activated          |
| <i>ARG1</i>         | -4.019            | Downregulates (1)  | Activated          |
| <i>APOC3</i>        | -2.498            | Downregulates (13) | Activated          |
| <i>APOC2</i>        | -1.155            | Downregulates (2)  | Activated          |
| <i>ACTA1</i>        | -3.146            | Regulates (2)      |                    |
| <i>APOM</i>         | -1.507            | Regulates (5)      |                    |
| <i>CFI</i>          | -1.277            | Regulates (1)      |                    |
| <i>ECI2</i>         | -1.072            | Regulates (1)      |                    |
| <i>FABP5</i>        | -1.361            | Regulates (3)      |                    |
| <i>GLUD1</i>        | -2.143            | Regulates (1)      |                    |
| <i>GPT</i>          | -1.644            | Regulates (1)      |                    |
| <i>HPX</i>          | -3.111            | Regulates (1)      |                    |
| <i>IFITM3</i>       | -1.042            | Regulates (1)      |                    |
| <i>IGFBP1</i>       | -1.422            | Regulates (7)      |                    |
| <i>IGFBP3</i>       | 1.583             | Regulates (1)      |                    |
| <i>SULT2A1</i>      | -2.190            | Regulates (3)      |                    |
| <i>UGT2B4</i>       | -2.320            | Regulates (1)      |                    |

\* PPAR $\alpha$  function predicted based on directions of target gene expression.
